# Supplementary material
Source: ML conference proceedings conference paper supplement (https://openaccess.thecvf.com/content/CVPR2023/html/Huang_RefSR-NeRF_Towards_High_CVPR_2023_paper.html)
Supplement: Supplementary file 1 [file Huang_RefSR-NeRF_Towards_High_CVPR_2023_supplemental.pdf]

# RefSR-NeRF: Towards High Fidelity and Super Resolution View Synthesis

## Supplementary Materials

Xudong Huang\*, Wei Li\*, Jie Hu, Hanting Chen, Yunhe Wang  
Huawei Noah’s Ark Lab

{huangxudong9, wei.lee, chenhan ting, hujie23, yunhe.wang}@huawei.com

Table 1. Quantitative comparison for novel view synthesis on the real forward-facing dataset [1]. With the input resolution  $504 \times 378$ , we report the quantitative metrics for upsampling scale at  $\times 2$ ,  $\times 4$  and  $\times 8$ . In addition to considerable acceleration, our method achieves more robust performance with the increasing of rendering scales.

| Method      | Metrics (NeRF-Blender $\times 4$ ) |                 |                    |
|-------------|------------------------------------|-----------------|--------------------|
|             | PSNR $\uparrow$                    | SSIM $\uparrow$ | LPIPS $\downarrow$ |
| Bicubic     | 26.46                              | 0.926           | 0.154              |
| NeRF-LR [2] | 24.56                              | 0.913           | 0.131              |
| Ours        | 27.88                              | 0.944           | 0.101              |

  

| Method      | Metrics (NeRF-Blender $\times 8$ ) |                 |                    |
|-------------|------------------------------------|-----------------|--------------------|
|             | PSNR $\uparrow$                    | SSIM $\uparrow$ | LPIPS $\downarrow$ |
| Bicubic     | 23.98                              | 0.893           | 0.188              |
| NeRF-LR [2] | 21.62                              | 0.873           | 0.179              |
| Ours        | 25.31                              | 0.909           | 0.171              |

Table 2. The ablations of the proposed RefSR model. Metrics are reported on NeRF-LLFF  $\times 4$  experiment setting.

| Method         | Metrics (NeRF-LLFF $\times 4$ ) |                 |                    |
|----------------|---------------------------------|-----------------|--------------------|
|                | PSNR $\uparrow$                 | SSIM $\uparrow$ | LPIPS $\downarrow$ |
| NeRF-LR        | 24.47                           | 0.701           | 0.388              |
| NeRF+TTSR [2]  | 23.43                           | 0.72            | 0.39               |
| NeRF+DATSR [3] | 24.71                           | 0.834           | 0.398              |
| Ours           | 25.37                           | 0.849           | 0.391              |

### 1. Synthetic 360° Dataset Details

We evaluate our method on the sythetic 360° dataset provided by the original NeRF paper. And we present the rendering quality on all 8 scenes. In our experiments, each scene takes 100 images for training and 25 images for testing. we report two experimental: scales  $\times 4$  with  $200 \times 200$  LR resolution (Table 3, 4 and 5) and scales  $\times 8$  with  $100 \times 100$  LR resolution (Table 6, 7 and 8).

\*Equal Contribution

### 2. The Real World Forward-Facing Dataset Details

we evaluate our method on the forward-facing dataset [1] and report each scene’s quantitative results, containing PSNR, SSIM, and VGG LPIPS. We test the scale for  $\times 2$ . (Table 9, 10, and 11),  $\times 4$  (Table 12, 13, and 14), and  $\times 8$  (Table 15, 16, and 17). For vanilla NeRF, in addition to training and testing models at high resolution, termed NeRF-HR, we also provide the model trained at low resolution and render at high resolution using spacial super-sampling (NeRF-LR).

### References

- [1] B. Mildenhall, P. P. Srinivasan, R. Ortiz-Cayon, N. K. Kalantari, R. Ramamoorthi, R. Ng, and A. Kar. Local light field fusion: Practical view synthesis with prescriptive sampling guidelines. *ACM Transactions on Graphics (TOG)*, 38(4):1–14, 2019. 1
- [2] B. Mildenhall, P. P. Srinivasan, M. Tancik, J. T. Barron, R. Ramamoorthi, and R. Ng. Nerf: Representing scenes as neural radiance fields for view synthesis. In *ECCV*, 2020. 1, 2, 3, 4
- [3] C. Wang, X. Wu, Y.-C. Guo, S.-H. Zhang, Y.-W. Tai, and S.-M. Hu. Nerf-sr: High-quality neural radiance fields using super-sampling. *arXiv preprint arXiv:2112.01759*, 2021. 1

Table 3. PSNR $\uparrow$ , test on the sythetic 360 $^\circ$  dataset for scale  $\times 4$ .

| Method      | PSNR (Blender $\times 4$ ) |       |       |        |       |           |       |       |       |
|-------------|----------------------------|-------|-------|--------|-------|-----------|-------|-------|-------|
|             | chair                      | drums | ficus | hotdog | lego  | materials | mic   | ship  | Avg   |
| Bicubic     | 28.06                      | 22.31 | 26.20 | 31.45  | 26.52 | 24.44     | 27.49 | 25.20 | 26.46 |
| NeRF-LR [2] | 26.44                      | 21.33 | 24.67 | 28.56  | 24.35 | 22.92     | 24.65 | 23.56 | 24.56 |
| Ours        | 29.17                      | 22.86 | 26.88 | 34.04  | 28.04 | 25.75     | 29.98 | 26.30 | 27.88 |

Table 4. SSIM $\uparrow$ , test on the sythetic 360 $^\circ$  dataset for scale  $\times 4$ .

| Method      | SSIM (Blender $\times 4$ ) |       |       |        |       |           |       |       |       |
|-------------|----------------------------|-------|-------|--------|-------|-----------|-------|-------|-------|
|             | chair                      | drums | ficus | hotdog | lego  | materials | mic   | ship  | Avg   |
| Bicubic     | 0.934                      | 0.896 | 0.940 | 0.968  | 0.922 | 0.916     | 0.955 | 0.879 | 0.926 |
| NeRF-LR [2] | 0.922                      | 0.886 | 0.926 | 0.957  | 0.898 | 0.903     | 0.945 | 0.866 | 0.913 |
| Ours        | 0.951                      | 0.917 | 0.952 | 0.980  | 0.947 | 0.939     | 0.972 | 0.896 | 0.944 |

Table 5. LPIPS $\downarrow$ , test on the sythetic 360 $^\circ$  dataset for scale  $\times 4$ .

| Method      | LPIPS (Blender $\times 4$ ) |       |       |        |       |           |       |       |       |
|-------------|-----------------------------|-------|-------|--------|-------|-----------|-------|-------|-------|
|             | chair                       | drums | ficus | hotdog | lego  | materials | mic   | ship  | Avg   |
| Bicubic     | 0.119                       | 0.213 | 0.091 | 0.146  | 0.152 | 0.142     | 0.081 | 0.285 | 0.154 |
| NeRF-LR [2] | 0.108                       | 0.168 | 0.096 | 0.077  | 0.141 | 0.141     | 0.069 | 0.244 | 0.131 |
| Ours        | 0.083                       | 0.127 | 0.066 | 0.056  | 0.102 | 0.105     | 0.049 | 0.223 | 0.101 |

Table 6. PSNR $\uparrow$ , test on the sythetic 360 $^\circ$  dataset for scale  $\times 8$ .

| Method      | PSNR (Blender $\times 8$ ) |       |       |        |       |           |       |       |       |
|-------------|----------------------------|-------|-------|--------|-------|-----------|-------|-------|-------|
|             | chair                      | drums | ficus | hotdog | lego  | materials | mic   | ship  | Avg   |
| Bicubic     | 25.81                      | 21.05 | 23.26 | 28.29  | 23.34 | 22.58     | 24.49 | 23.03 | 23.98 |
| NeRF-LR [2] | 23.73                      | 19.29 | 21.95 | 25.01  | 21.08 | 20.11     | 20.89 | 20.87 | 21.62 |
| Ours        | 27.06                      | 21.64 | 23.45 | 30.95  | 24.27 | 24.02     | 27.10 | 24.02 | 25.31 |

Table 7. SSIM $\uparrow$ , test on the sythetic 360 $^\circ$  dataset for scale  $\times 8$ .

| Method      | SSIM (Blender $\times 8$ ) |       |       |        |       |           |       |       |       |
|-------------|----------------------------|-------|-------|--------|-------|-----------|-------|-------|-------|
|             | chair                      | drums | ficus | hotdog | lego  | materials | mic   | ship  | Avg   |
| Bicubic     | 0.905                      | 0.865 | 0.902 | 0.945  | 0.866 | 0.886     | 0.929 | 0.844 | 0.893 |
| NeRF-LR [2] | 0.888                      | 0.840 | 0.886 | 0.929  | 0.837 | 0.866     | 0.913 | 0.827 | 0.873 |
| Ours        | 0.927                      | 0.893 | 0.910 | 0.966  | 0.891 | 0.865     | 0.958 | 0.865 | 0.909 |

Table 8. LPIPS $\downarrow$ , test on the sythetic 360 $^\circ$  dataset for scale  $\times 8$ .

| Method      | LPIPS (Blender $\times 8$ ) |       |       |        |       |           |       |       |       |
|-------------|-----------------------------|-------|-------|--------|-------|-----------|-------|-------|-------|
|             | chair                       | drums | ficus | hotdog | lego  | materials | mic   | ship  | Avg   |
| Bicubic     | 0.146                       | 0.201 | 0.131 | 0.174  | 0.216 | 0.176     | 0.115 | 0.343 | 0.188 |
| NeRF-LR [2] | 0.144                       | 0.213 | 0.140 | 0.130  | 0.216 | 0.173     | 0.118 | 0.299 | 0.179 |
| Ours        | 0.122                       | 0.173 | 0.140 | 0.094  | 0.191 | 0.284     | 0.083 | 0.284 | 0.171 |

Table 9. PSNR $\uparrow$ , test on the LLFF dataset for scale  $\times 2$ .

| Method      | PSNR (NeRF-LLFF $\times 2$ ) |        |          |       |        |         |       |       |
|-------------|------------------------------|--------|----------|-------|--------|---------|-------|-------|
|             | fern                         | flower | fortress | horns | leaves | orchids | room  | trex  |
| Bicubic     | 23.45                        | 26.59  | 29.87    | 25.73 | 20.01  | 20.03   | 28.80 | 24.73 |
| NeRF-HR [2] | 25.17                        | 27.40  | 31.16    | 27.45 | 20.92  | 20.36   | 32.70 | 26.80 |
| Ours        | 24.20                        | 27.32  | 31.15    | 27.59 | 20.25  | 20.13   | 32.29 | 26.89 |

Table 10. SSIM $\uparrow$ , test on the LLFF dataset for scale  $\times 2$ .

| Method      | SSIM (NeRF-LLFF $\times 2$ ) |        |          |       |        |         |       |       |
|-------------|------------------------------|--------|----------|-------|--------|---------|-------|-------|
|             | fern                         | flower | fortress | horns | leaves | orchids | room  | trex  |
| Bicubic     | 0.814                        | 0.884  | 0.917    | 0.864 | 0.732  | 0.714   | 0.944 | 0.886 |
| NeRF-HR [2] | 0.792                        | 0.827  | 0.881    | 0.828 | 0.690  | 0.641   | 0.948 | 0.880 |
| Ours        | 0.847                        | 0.902  | 0.941    | 0.912 | 0.753  | 0.734   | 0.974 | 0.932 |

Table 11. LPIPS $\downarrow$ , test on the LLFF dataset for scale  $\times 2$ .

| Method      | LPIPS (NeRF-LLFF $\times 2$ ) |        |          |       |        |         |       |       |
|-------------|-------------------------------|--------|----------|-------|--------|---------|-------|-------|
|             | fern                          | flower | fortress | horns | leaves | orchids | room  | trex  |
| Bicubic     | 0.342                         | 0.253  | 0.217    | 0.336 | 0.364  | 0.352   | 0.235 | 0.306 |
| NeRF-HR [2] | 0.280                         | 0.219  | 0.171    | 0.268 | 0.316  | 0.321   | 0.178 | 0.249 |
| Ours        | 0.283                         | 0.217  | 0.183    | 0.252 | 0.324  | 0.305   | 0.151 | 0.232 |

Table 12. PSNR $\uparrow$ , test on the LLFF dataset for scale  $\times 4$ .

| Method      | PSNR (NeRF-LLFF $\times 4$ ) |        |          |       |        |         |       |       |
|-------------|------------------------------|--------|----------|-------|--------|---------|-------|-------|
|             | fern                         | flower | fortress | horns | leaves | orchids | room  | trex  |
| Bicubic     | 22.66                        | 26.21  | 29.23    | 24.61 | 19.50  | 19.79   | 27.73 | 23.82 |
| NeRF-HR [2] | 23.57                        | 26.88  | 29.98    | 25.81 | 19.93  | 19.84   | 31.12 | 25.52 |
| Ours        | 23.30                        | 26.85  | 30.13    | 26.12 | 19.76  | 19.90   | 31.18 | 25.63 |

Table 13. SSIM $\uparrow$ , test on the LLFF dataset for scale  $\times 4$ .

| Method      | SSIM (NeRF-LLFF $\times 4$ ) |        |          |       |        |         |       |       |
|-------------|------------------------------|--------|----------|-------|--------|---------|-------|-------|
|             | fern                         | flower | fortress | horns | leaves | orchids | room  | trex  |
| Bicubic     | 0.780                        | 0.872  | 0.902    | 0.819 | 0.677  | 0.704   | 0.928 | 0.838 |
| NeRF-HR [2] | 0.810                        | 0.882  | 0.917    | 0.857 | 0.708  | 0.714   | 0.963 | 0.890 |
| Ours        | 0.811                        | 0.888  | 0.921    | 0.871 | 0.703  | 0.722   | 0.965 | 0.897 |

Table 14. LPIPS $\downarrow$ , test on the LLFF dataset for scale  $\times 4$ .

| Method      | LPIPS (NeRF-LLFF $\times 4$ ) |        |          |       |        |         |       |       |
|-------------|-------------------------------|--------|----------|-------|--------|---------|-------|-------|
|             | fern                          | flower | fortress | horns | leaves | orchids | room  | trex  |
| Bicubic     | 0.463                         | 0.408  | 0.329    | 0.477 | 0.467  | 0.471   | 0.437 | 0.450 |
| NeRF-HR [2] | 0.41                          | 0.376  | 0.295    | 0.428 | 0.430  | 0.444   | 0.388 | 0.401 |
| Ours        | 0.433                         | 0.389  | 0.332    | 0.411 | 0.430  | 0.447   | 0.362 | 0.382 |

Table 15. PSNR $\uparrow$ , test on the LLFF dataset for scale  $\times 8$ .

| Method      | PSNR (NeRF-LLFF $\times 8$ ) |        |          |       |        |         |       |       |
|-------------|------------------------------|--------|----------|-------|--------|---------|-------|-------|
|             | fern                         | flower | fortress | horns | leaves | orchids | room  | trex  |
| Bicubic     | 22.48                        | 26.01  | 28.99    | 22.33 | 19.35  | 19.67   | 27.45 | 20.07 |
| NeRF-LR [2] | 21.05                        | 24.49  | 26.57    | 18.97 | 17.82  | 18.89   | 25.07 | 20.81 |
| NeRF-HR [2] | 22.85                        | 26.16  | 29.15    | 23.82 | 19.47  | 19.64   | 29.39 | 23.26 |
| Ours        | 23.04                        | 26.61  | 29.68    | 25.36 | 19.55  | 19.79   | 30.01 | 24.99 |

Table 16. SSIM $\uparrow$ , test on the LLFF dataset for scale  $\times 8$ .

| Method      | SSIM (NeRF-LLFF $\times 8$ ) |        |          |       |        |         |       |       |
|-------------|------------------------------|--------|----------|-------|--------|---------|-------|-------|
|             | fern                         | flower | fortress | horns | leaves | orchids | room  | trex  |
| Bicubic     | 0.802                        | 0.884  | 0.916    | 0.860 | 0.698  | 0.748   | 0.923 | 0.827 |
| NeRF-LR [2] | 0.777                        | 0.868  | 0.893    | 0.765 | 0.658  | 0.729   | 0.912 | 0.794 |
| NeRF-HR [2] | 0.817                        | 0.886  | 0.920    | 0.851 | 0.708  | 0.750   | 0.946 | 0.837 |
| Ours        | 0.824                        | 0.894  | 0.924    | 0.853 | 0.714  | 0.763   | 0.951 | 0.876 |

Table 17. LPIPS $\downarrow$ , test on the LLFF dataset for scale  $\times 8$ .

| Method      | LPIPS (NeRF-LLFF $\times 8$ ) |        |          |       |        |         |       |       |
|-------------|-------------------------------|--------|----------|-------|--------|---------|-------|-------|
|             | fern                          | flower | fortress | horns | leaves | orchids | room  | trex  |
| Bicubic     | 0.521                         | 0.491  | 0.447    | 0.335 | 0.550  | 0.560   | 0.483 | 0.497 |
| NeRF-LR [2] | 0.510                         | 0.493  | 0.433    | 0.586 | 0.548  | 0.548   | 0.489 | 0.502 |
| NeRF-HR [2] | 0.497                         | 0.482  | 0.409    | 0.519 | 0.541  | 0.521   | 0.483 | 0.502 |
| Ours        | 0.467                         | 0.475  | 0.411    | 0.502 | 0.520  | 0.523   | 0.408 | 0.425 |
